# Supplementary material
Source: PubMed Central journal article supplement (PMC4049514)
Supplement: NIHMS593731-supplement-Supplemental_Information.pdf [file NIHMS593731-supplement-Supplemental_Information.pdf]

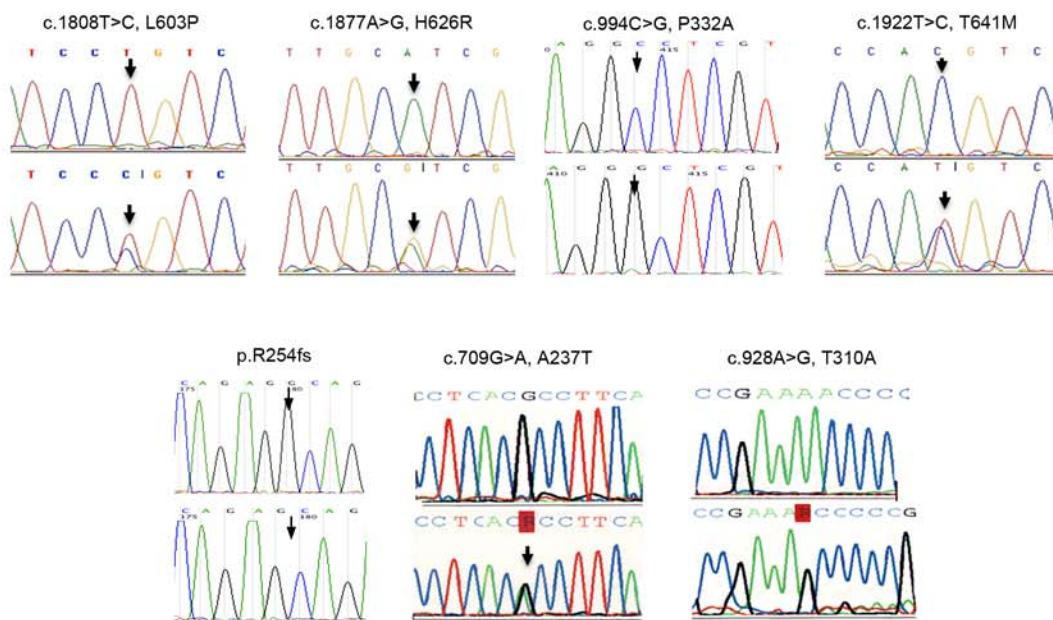

**Supplementary Figure 1:** DNA sequencing analysis of the DCM patients harboring novel *RAF1* (NM\_002880) mutations

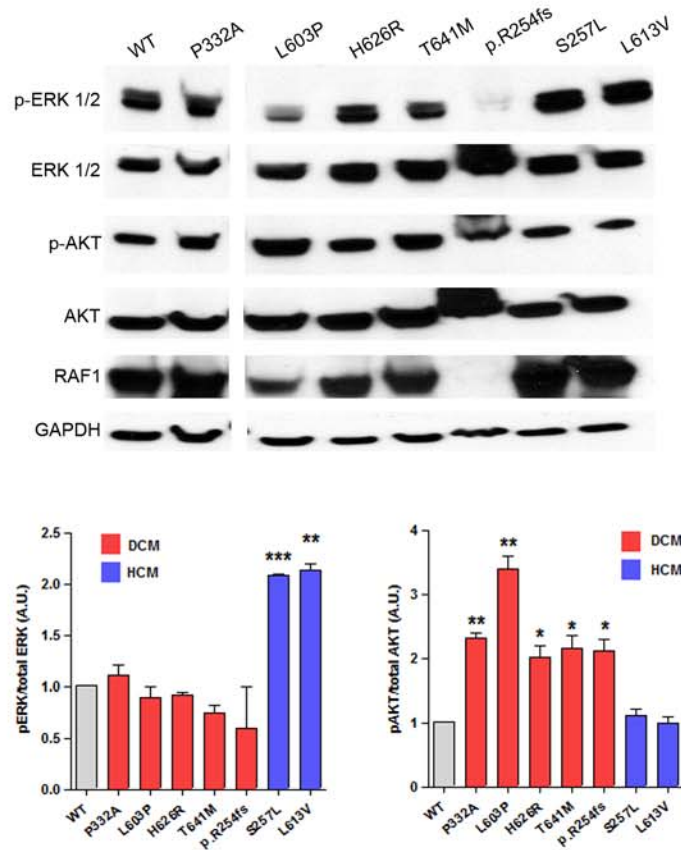

**Supplementary Figure 2.** DCM-associated mutant RAF1 proteins hyperactivate AKT but not ERK1/2. Representative immunoblot with total lysates from HEK293 cells expressing wild-type (WT), DCM-associated mutant RAF1 proteins (p.Pro332Ala, p.Leu603Pro, p.His626Arg, p.Thr641Met and p.Arg254fs) and HCM-associated mutant RAF1 proteins (p.Ser257Leu and p.Leu613Val) that were stimulated with EGF for 15 minutes. The blot was probed with anti-phospho-ERK1/2, anti-ERK1/2, anti-phospho-AKT, anti-AKT and anti-RAF1 antibodies. Expression levels were normalized to respective total proteins and expressed as Relative Expression compared to the level in the cells overexpressing WT RAF1. GAPDH levels were used as loading control. Data are means  $\pm$  SD of two independent experiments assayed in duplicates. \* $p < 0.05$ , \*\* $p < 0.01$ , \*\*\* $p < 0.001$  vs WT.

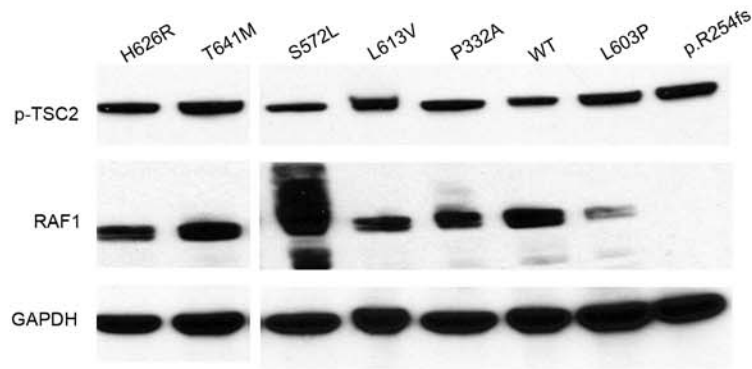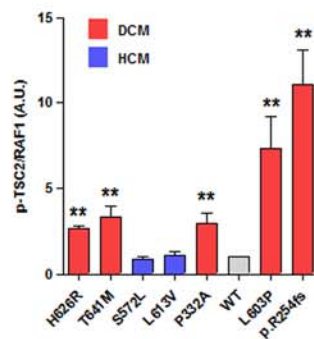

**Supplementary Figure 3:** DCM-associated RAF1 mutants activate AKT/mTOR pathway as indicated by tuberlin phosphorylation. Representative immunoblot with total lysates from HEK293 cells expressing wild-type (WT), DCM-associated mutant RAF1 proteins (p.Pro332Ala, p.Leu603Pro, p.His626Arg, p.Thr641Met and p.Arg254fs) and HCM-associated mutant RAF1 proteins (p.Ser257Leu and p.Leu613Val) that were stimulated with EGF for 15 minutes. The blot was probed with anti-phospho-TSC2, anti-RAF1 and anti-GAPDH antibodies. Expression levels were normalized to RAF1 and expressed as Relative Expression compared to level in the WT cells. GAPDH levels were used as loading control. Data are means  $\pm$  SD of two independent experiments assayed in duplicates \*\* $p < 0.01$  vs WT.

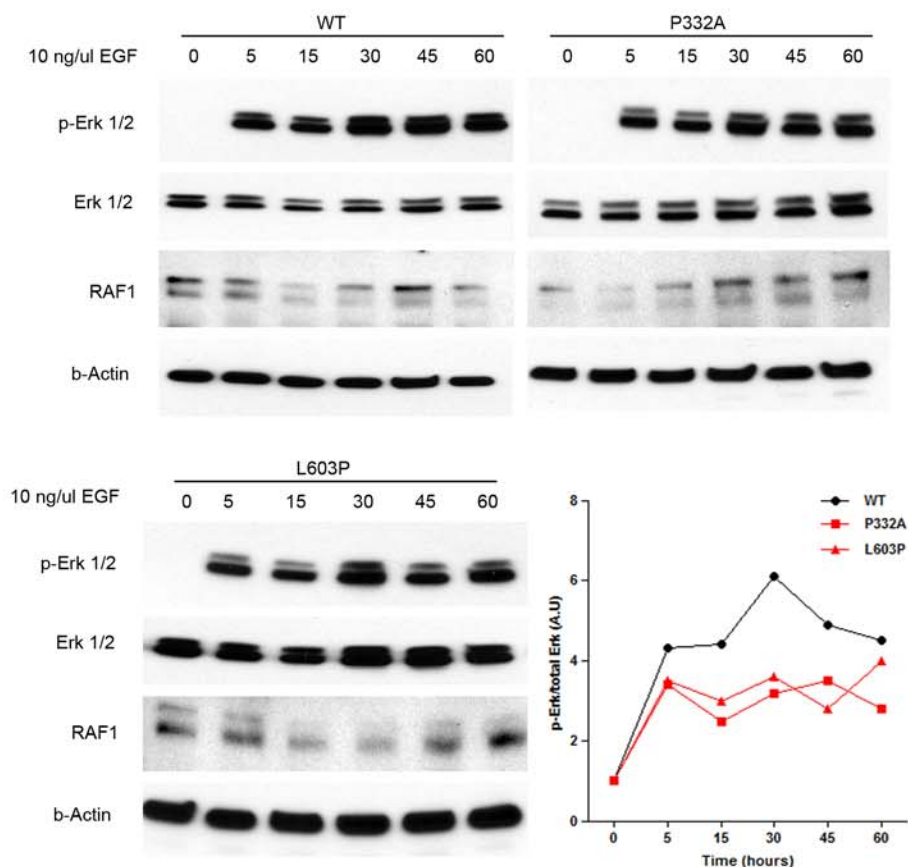

**Supplementary Figure 4.** DCM-associated RAF1 mutants show impaired Erk1/2 activation in *Raf1*<sup>-/-</sup> MEFs. Immunoblot with total lysates from mouse embryonic fibroblasts (MEFs) from *Raf1* knockout mice (*Raf1*<sup>-/-</sup>) expressing wild-type (WT) and two representative DCM mutants (p.Pro332Ala and p.Leu603Pro) that were stimulated with EGF at 0, 5, 15, 30, 45 and 60 minutes and probed with anti-phospho-Erk1/2, anti-Erk1/2 and anti-RAF1 antibodies. Expression levels were normalized to respective total proteins and expressed as Relative Expression compared to level in the WT cells with indicated time points. Beta-Actin levels were used as loading control.

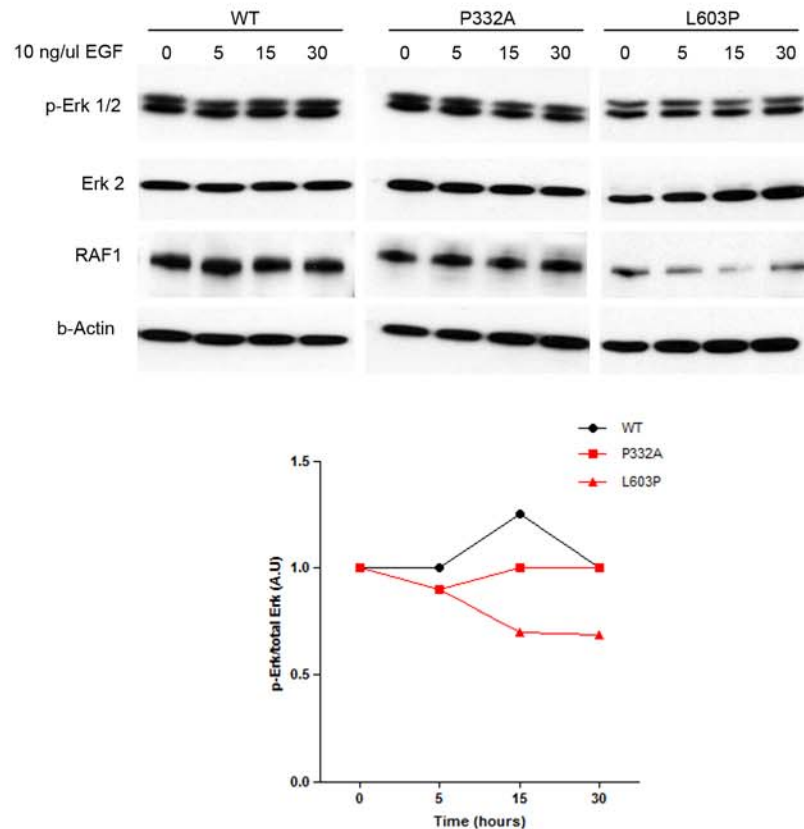

**Supplementary Figure 5:** DCM-associated RAF1 mutants fail to activate Erk1/2 in *Braf*<sup>-/-</sup> MEFs. Immunoblot with total lysates from mouse embryonic fibroblasts (MEFs) from *Braf* knockout mice (*Braf*<sup>-/-</sup>) expressing wild-type (WT) and two representative DCM mutants (p.Pro332Ala and p.Leu603Pro) that were stimulated with EGF at 0, 5, 15, and 30 minutes and probed with anti-phospho-Erk1/2, anti-Erk 2 and anti-RAF1 antibodies. Expression levels were normalized to respective total proteins and expressed as Relative Expression compared to level in the WT cells with indicated time points. Beta-Actin levels were used as loading control.

**Supplementary Table 1.** *Titin* (NM\_001267550.1) polymorphisms observed in *RAF1* positive patients

| <b>Exon</b> | <b>Nucleotide Change</b> | <b>AA Change</b> | <b>Pathogenicity</b> | <b>P1</b> | <b>P2A</b> | <b>P2B</b> | <b>P3</b> | <b>P4</b> | <b>P5</b> | <b>P6</b> | <b>P7</b> | <b>P8</b> |
|-------------|--------------------------|------------------|----------------------|-----------|------------|------------|-----------|-----------|-----------|-----------|-----------|-----------|
| 7           | c.982C>T                 | p.Arg328Cys      | None known           | CC        | CT         | CT         | CC        | CC        | CC        | CT        | CT        | CT        |
| 309         | c.64208C>T               | p.Thr21403Ile    | None known           | CC        | TT         | CT         | CC        | TT        | CC        | CT        | CT        | CT        |

**Supplementary Table 2:** Bioinformatic analysis of the effects of *RAF1* mutations

| <b>Exon</b> | <b>Nucleotide Change</b> | <b>Amino Acid Change</b> | <b><i>PolyPhen-2</i></b> | <b><i>pMUT</i></b>  | <b><i>SIFT</i></b> |
|-------------|--------------------------|--------------------------|--------------------------|---------------------|--------------------|
| 5           | c.709G>A                 | p.Ala237Thr              | Benign                   | Neutral             | Tolerated          |
| 9           | c.928A>G                 | p.Thr310Ala              | Benign                   | Neutral             | Tolerated          |
| 10          | c.994C>G                 | p.Pro332Ala              | Benign                   | <b>Pathological</b> | Tolerated          |
| 17          | c.1808T>C                | p.Leu603Pro              | <b>Probably damaging</b> | <b>Pathological</b> | Affects protein    |
| 17          | c.1877A>G                | p.His626Arg              | <b>Probably damaging</b> | <b>Pathological</b> | Tolerated          |
| 17          | c.1922C>T                | p.Thr641Met              | <b>Probably damaging</b> | <b>Pathological</b> | Affects protein    |
